# Supplementary material for: An Investigation of Severe Influenza Cases in Russia during the 2022–2023 Epidemic Season and an Analysis of HA-D222G/N Polymorphism in Newly Emerged and Dominant Clade 6B.1A.5a.2a A(H1N1)pdm09 Viruses
Source: MDPI journal article supplement (doi:10.3390/pathogens13010001), 2023-12-19
Supplement: s1 [file s1]

**Table S1.** HIA assay results for individual A(H1N1)pdm09 isolates.

(A) The table shows fold change between homologous ferret antiserum titre and titre determined in HIA with tested A(H1N1)pdm09 strains isolated in Russia in 2022-2023 flu season.

| №  | Tested strain                 | Flu vaccination status <sup>a</sup> | Specimen collection date | Clade   | Passage history  | Fold change between homologous antiserum titre and titre determined in HIA with tested strain: |                                          |                                            | HA amino acid substitutions <sup>b</sup> |
|----|-------------------------------|-------------------------------------|--------------------------|---------|------------------|------------------------------------------------------------------------------------------------|------------------------------------------|--------------------------------------------|------------------------------------------|
|    |                               |                                     |                          |         |                  | Ferret antisera against:                                                                       |                                          |                                            |                                          |
|    |                               |                                     |                          |         |                  | A/Victoria/2570/2019 (egg) 5a.2                                                                | A/Wisconsin/588/2019 (cell culture) 5a.2 | A/Guangdong-Maonan/SWL1536/2019 (egg) 5a.1 |                                          |
| 1  | A/Altai Krai/193-17V/2022     | Unk.                                | 20.12.2022               | 5a.2a   | MD1 <sup>c</sup> | 0.5                                                                                            | 0.25                                     | 16                                         | I418V                                    |
| 2  | A/Belgorod/73-6V/2022         | NV                                  | 11.11.2022               | 5a.2a   | MD2              | 0.5                                                                                            | 0.25                                     | 16                                         | I418V                                    |
| 3  | A/Buryatia/106-6V/2022        | NV                                  | 19.11.2022               | 5a.2a.1 | MD2              | 1                                                                                              | 0.25                                     | 64                                         |                                          |
| 4  | A/Cheboksary/293-t2V/2023     | Unk.                                | 13.02.2023               | 5a.2a   | MD1              | 0.25                                                                                           | 0.25                                     | ND <sup>d</sup>                            | I418V, V19I, T391K                       |
| 5  | A/Chelyabinsk/307-t17V/2023   | NV                                  | 08.01.2023               | 5a.2a   | MD1              | 1                                                                                              | 0.5                                      | 16                                         | I418V, D222N                             |
| 6  | A/Chelyabinsk/322-l20V/2023   | NV                                  | 13.01.2023               | 5a.2a   | MD1              | 1                                                                                              | 0.5                                      | 16                                         | I418V, D222N                             |
| 7  | A/Ekaterinburg/111-l13V/2023  | Unk.                                | 25.11.2022               | 5a.2a   | MD1              | 2                                                                                              | 0.5                                      | 16                                         | I418V, V47I, D187V                       |
| 8  | A/Ekaterinburg/225-17V/2022   | V                                   | 20.12.2022               | 5a.2a   | MD1              | 0.5                                                                                            | 0.25                                     | ND                                         | I418V, S83P                              |
| 9  | A/HMAO/133-lp5V/2023          | NV                                  | 30.11.2022               | 5a.2a   | MD1              | 1                                                                                              | 0.25                                     | 32                                         | I418V                                    |
| 10 | A/HMAO/207-20V/2023           | V                                   | 10.12.2022               | 5a.2a   | MD1              | 0.5                                                                                            | 0.25                                     | ND                                         | I418V                                    |
| 11 | A/HMAO/207-b24V/2022          | NV                                  | 29.12.2022               | 5a.2a   | MD1              | 1                                                                                              | 0.5                                      | 16                                         | I418V                                    |
| 12 | A/HMAO/207-l23V/2022          | NV                                  | 29.12.2022               | 5a.2a   | MD1              | 1                                                                                              | 0.25                                     | 16                                         | I418V                                    |
| 13 | A/Irkutsk/236-l15V/2023       | NV                                  | 28.12.2022               | 5a.2a   | MD1              | 0.5                                                                                            | 0.25                                     | 16                                         | I418V                                    |
| 14 | A/Kaliningrad/101-rl7V/2022   | NV                                  | 28.11.2022               | 5a.2a   | MD1              | 0.5                                                                                            | 0.25                                     | ND                                         | I418V, D222N                             |
| 15 | A/Kaliningrad/217-lps10V/2022 | NV                                  | 21.12.2022               | 5a.2a   | MD1              | 1                                                                                              | 0.25                                     | 32                                         | I418V, I214V, D222N                      |

|    |                                   |      |            |       |     |      |      |     |                        |
|----|-----------------------------------|------|------------|-------|-----|------|------|-----|------------------------|
| 16 | A/Kaliningrad/243-ls14V/2023      | NV   | 23.12.2022 | 5a.2a | MD1 | 1    | 0.25 | 16  | I418V, D222N           |
| 17 | A/Kaliningrad/243-ls15V/2023      | Unk. | 27.12.2022 | 5a.2a | MD1 | 1    | 0.25 | 16  | I418V                  |
| 18 | A/Kaliningrad/252-tb19V/2023      | NV   | 10.01.2023 | 5a.2a | MD1 | 1    | 0.25 | 16  | I418V                  |
| 19 | A/Khabarovsk/95-10V/2022          | V    | 28.11.2022 | 5a.2a | MD1 | 0.5  | 0.25 | ND  | I418V, Q293R           |
| 20 | A/KHMAO/207-t22V/2022             | NV   | 16.12.2022 | 5a.2a | MD2 | 1    | 0.5  | 16  | I418V, D222G           |
| 21 | A/KhMAO/271-37V/2023              | V    | 01.02.2023 | 5a.2a | MD1 | 0.5  | 0.25 | ND  | I418V                  |
| 22 | A/KhMAO/271-39V/2023              | V    | 01.02.2023 | 5a.2a | MD1 | 0.5  | 0.25 | ND  | I418V, D269N           |
| 23 | A/Krasnoyarsk/119-ll10V/2022      | NV   | 02.12.2022 | 5a.2a | MD1 | 1    | 0.5  | 32  | I418V,<br>D222D/N      |
| 24 | A/Krasnoyarsk/176-18V/2022        | V    | 21.12.2022 | 5a.2a | MD1 | 0.25 | 0.25 | ND  | I418V                  |
| 25 | A/Krasnoyarsk/201-t27V/2022       | Unk. | 19.12.2022 | 5a.2a | MD1 | 0.25 | 0.25 | 32  | I418V                  |
| 26 | A/Krasnoyarsk/213am28V/2022       | Unk. | 18.12.2022 | 5a.2a | MD1 | 1    | 0.25 | 16  | I418V, V173I           |
| 27 | A/Krasnoyarsk/230-ll31V/2023      | NV   | 29.12.2022 | 5a.2a | MD1 | 0.5  | 0.25 | ND  | I418V                  |
| 28 | A/Krasnoyarsk/253-ll36V/2023      | NV   | 10.01.2023 | 5a.2a | MD1 | 1    | 0.5  | 16  | I418V, A261V           |
| 29 | A/Murmansk/197-l6V/2022           | NV   | 19.12.2022 | 5a.2a | MD1 | 1    | 0.5  | ND  | I418V, K302R,<br>D222N |
| 30 | A/Novosibirsk/192-t21V/2022       | Unk. | 19.12.2022 | 5a.2a | MD2 | 8    | 2    | >64 | I418V, S190R           |
| 31 | A/Novosibirsk/198-t22V/2022       | Unk. | 21.12.2022 | 5a.2a | MD2 | 1    | 0.5  | 32  | I418V, D222N           |
| 32 | A/Novosibirsk/218-<br>sec27V/2022 | Unk. | 09.12.2022 | 5a.2a | MD1 | 1    | 0.25 | 16  | I418V, D222G           |
| 33 | A/Novosibirsk/69-12V/2022         | Unk. | 14.11.2022 | 5a.2a | MD2 | 0.5  | 0.25 | 16  | I418V                  |
| 34 | A/Omsk/138-l7V/2022               | NV   | 06.12.2022 | 5a.2a | MD1 | 0.5  | 0.25 | 32  | I418V, V525M,<br>D222N |
| 35 | A/Omsk/203-l8V/2022               | NV   | 22.12.2022 | 5a.2a | MD1 | 0.5  | 0.25 | 16  | I418V, Q293R,<br>D222N |
| 36 | A/Omsk/295-t12V/2023              | NV   | 15.02.2023 | 5a.2a | MD1 | 0.5  | 0.5  | 16  | I418V                  |
| 37 | A/Omsk/337-l14V/2023              | NV   | 11.04.2023 | 5a.2a | MD1 | 1    | 0.5  | 16  | I418V, S326P           |
| 38 | A/Orenburg/255-l14V/2023          | NV   | 09.01.2023 | 5a.2a | MD1 | 1    | 0.25 | 16  | I418V                  |

|    |                                      |      |            |       |     |     |       |    |                                    |
|----|--------------------------------------|------|------------|-------|-----|-----|-------|----|------------------------------------|
| 39 | A/Pskov/231-I35V/2023                | Unk. | 26.12.2022 | 5a.2a | MD1 | 1   | 0.25  | 16 | I418V, N370D,<br>D222N             |
| 40 | A/Pskov/231-I36V/2023                | Unk. | 26.12.2022 | 5a.2a | MD1 | 1   | 0.5   | 16 | I418V, V152I                       |
| 41 | A/Russia/183-9V/2022                 | V    | 15.12.2022 | 5a.2a | MD1 | 0.5 | 0.25  | ND | I418V                              |
| 42 | A/Russia/319-I41V/2023               | NV   | 18.01.2023 | 5a.2a | MD1 | 1   | 0.5   | 16 | I418V, D35G,<br>D222N              |
| 43 | A/Saint-Petersburg/182-<br>b11V/2023 | Unk. | 13.12.2022 | 5a.2a | MD1 | 0.5 | 0.25  | ND | I418V, R113K,<br>T376A,<br>D222D/N |
| 44 | A/Sakha/164-t7V/2023                 | Unk. | 12.12.2022 | 5a.2a | MD1 | 0.5 | 0.125 | 8  | I418V                              |
| 45 | A/Saratov/250-rl14V/2023             | Unk. | 12.01.2023 | 5a.2a | MD1 | 1   | 0.25  | 16 | I418V                              |
| 46 | A/Stavropol/233-I9V/2023             | NV   | 18.12.2022 | 5a.2a | MD1 | 1   | 0.25  | 16 | I418V                              |
| 47 | A/Tatarstan/174-II13V/2022           | NV   | 08.12.2022 | 5a.2a | MD1 | 0.5 | 0.125 | 16 | I418V                              |
| 48 | A/Tomsk/240-I7V/2023                 | Unk. | 12.01.2023 | 5a.2a | MD1 | 0.5 | 0.25  | ND | I418V                              |
| 49 | A/Tver/107-t2V/2022                  | NV   | 28.11.2022 | 5a.2a | MD1 | 1   | 0.25  | 16 | I418V                              |
| 50 | A/Tyumen/185-I13V/2022               | NV   | 15.12.2022 | 5a.2a | MD1 | 1   | 0.25  | 16 | I418V, D222N                       |
| 51 | A/Tyumen/234-I15V/2023               | NV   | 11.01.2023 | 5a.2a | MD1 | 2   | 0.5   | 8  | I418V, D222N                       |
| 52 | A/Vladimir/163-I2V/2022              | NV   | 05.12.2022 | 5a.2a | MD1 | 0.5 | 0.25  | ND | I418V, D222N                       |
| 53 | A/Vologda/168-I8V/2023               | NV   | 06.12.2022 | 5a.2a | MD1 | 1   | 0.25  | 16 | I418V, E283K                       |
| 54 | A/Vologda/189-t10V/2022              | NV   | 13.12.2022 | 5a.2a | MD1 | 0.5 | 0.25  | 16 | I418V                              |
| 55 | A/Yarosavl/301-I12V/2023             | NV   | 18.02.2023 | 5a.2a | MD1 | 0.5 | 0.25  | 16 | I418V                              |
| 56 | A/Yarosavl/301-t14V/2023             | NV   | 18.02.2023 | 5a.2a | MD1 | 0.5 | 0.5   | 16 | I418V                              |
| 57 | A/Yaroslavl/128-pl1V/2022            | NV   | 06.12.2022 | 5a.2a | MD1 | 0.5 | 0.25  | 16 | I418V, N455D,<br>Y468H,<br>D222D/N |
| 58 | A/Yaroslavl/238-I11V/2023            | NV   | 24.12.2022 | 5a.2a | MD1 | 1   | 0.25  | 16 | I418V                              |
| 59 | A/Yaroslavl/301-I16V/2023            | Unk. | 18.02.2023 | 5a.2a | MD1 | 0.5 | 0.5   | 16 | I418V                              |
| 60 | A/Yekaterinburg/111-I11V/2022        | Unk. | 21.11.2022 | 5a.2a | MD1 | 1   | 0.25  | 16 | I418V                              |

|    |                         |   |            |    |     |      |      |    |    |
|----|-------------------------|---|------------|----|-----|------|------|----|----|
| 61 | A/Kemerovo/154-10V/2022 | V | 07.12.2022 | ND | MD1 | 0.5  | 0.25 | ND | ND |
| 62 | A/Kemerovo/154-7V/2022  | V | 05.12.2022 | ND | MD1 | 0.5  | 0.25 | ND | ND |
| 63 | A/Kemerovo/154-8V/2022  | V | 07.12.2022 | ND | MD1 | 0.5  | 0.25 | 16 | ND |
| 64 | A/Kemerovo/154-9V/2022  | V | 07.12.2022 | ND | MD1 | 0.5  | 0.25 | ND | ND |
| 65 | A/KhMAO/179-15V/2022    | V | 13.12.2022 | ND | MD1 | 0.5  | 0.25 | ND | ND |
| 66 | A/Kurgan/145-9V/2022    | V | 30.11.2022 | ND | MD1 | 0.5  | 0.5  | ND | ND |
| 67 | A/Saratov/181-11V/2022  | V | 13.12.2022 | ND | MD1 | 0.5  | 0.25 | ND | ND |
| 68 | A/Saratov/181-12V/2022  | V | 13.12.2022 | ND | MD1 | 0.5  | 0.25 | ND | ND |
| 69 | A/Stavropol/124-6V/2022 | V | 28.11.2022 | ND | MD1 | 0.25 | 0.25 | ND | ND |

<sup>a</sup> – Flu vaccination status: V – vaccinated, NV – not vaccinated, Unk. - unknown;

<sup>b</sup> – non clade-specific HA amino acid substitutions compared to A/Victoria/2570/2019. In addition to the substitutions indicated in the table, all viruses from the 5a.2a and 5a.2a.1 clades have a subset of the clade-specific substitutions (K54Q, A186T, Q189E, E224A, R259K, K308R); virus from the 5a.2a.1 clade also have additional 5a.2a.1-clade specific substitutions P137S, K142R, D260E, T277A, E356D, I418V and N451H, compared to A/Victoria/2570/2019.

<sup>c</sup> – MD – MDCK cell culture;

<sup>d</sup> – ND – not determined.

**(B)** Characterization of influenza A(H1N1)pdm09 viruses in HIA with turkey red blood cells (1).

| Virus                           | Clade         | Passage history  | Collection date | Reverse HIA titers with ferret antisera raised against: |                      |                      |
|---------------------------------|---------------|------------------|-----------------|---------------------------------------------------------|----------------------|----------------------|
|                                 |               |                  |                 | A/Guangdong-Maonan/SWL1536/2019                         | A/Victoria/2570/2019 | A/Wisconsin/588/2019 |
|                                 |               |                  |                 | egg                                                     | egg                  | cell                 |
|                                 |               |                  |                 | fer. 11/20, FCI                                         | fer. 27/20, FCI      | fer. 25/20, FCI      |
|                                 |               |                  |                 | 6B.1A.5a.1                                              | 6B.1A.5a.2           | 6B.1A.5a.2           |
| <b>Reference strains</b>        |               |                  |                 |                                                         |                      |                      |
| A/Guangdong-Maonan/SWL1536/2019 | 6B.1A.5a.1    | Ex/E1            | 17.06.2019      | 5120                                                    | <160                 | <320                 |
| A/Victoria/2570/2019            | 6B.1A.5a.2    | E4/E2/E1         | 22.11.2019      | 640                                                     | 1280                 | 5120                 |
| A/Wisconsin/588/2019            | 6B.1A.5a.2    | C2/SIAT1/MD2/MD1 | 19.12.2019      | 1280                                                    | 320                  | 2560                 |
| <b>Tested strains</b>           |               |                  |                 |                                                         |                      |                      |
| A/Novosibirsk/198-t22V/2022     | 6B.1A.5a.2a   | MDCK2            | 21.12.2022      | 160                                                     | 1280                 | 5120                 |
| A/Krasnoyarsk/119-II10V/2022    | 6B.1A.5a.2a   | MDCK1            | 02.12.2022      | 160                                                     | 1280                 | 5120                 |
| A/Buryatia/106-6V/2022          | 6B.1A.5a.2a.1 | MDCK2            | 19.11.2022      | 80                                                      | 1280                 | 10240                |
| A/Kemerovo/154-8V/2022          |               | MDCK1            | 07.12.2022      | 320                                                     | 2560                 | 10240                |
| A/KHMAO/207-t22V/2022           | 6B.1A.5a.2a   | MDCK2            | 16.12.2022      | 320                                                     | 1280                 | 5120                 |
| A/Belgorod/73-6V/2022           | 6B.1A.5a.2a   | MDCK2            | 11.11.2022      | 320                                                     | 2560                 | 10240                |
| A/Novosibirsk/69-12V/2022       | 6B.1A.5a.2a   | MDCK2            | 14.11.2022      | 320                                                     | 2560                 | 10240                |
| A/Ekaterinburg/111-I13V/2023    | 6B.1A.5a.2a   | MDCK1            | 25.11.2022      | 320                                                     | 640                  | 5120                 |
| A/Novosibirsk/192-t21V/2022     | 6B.1A.5a.2a   | MDCK2            | 19.12.2022      | <80                                                     | 160                  | 1280                 |

Fold change relative to the homologous titer:

|  |     |
|--|-----|
|  | ≤ 4 |
|  | ≥ 8 |

NA – not assessed

## Characterization of influenza A(H1N1)pdm09 viruses in HIA with turkey red blood cells (2).

| Virus                            | Clade          | Passage history  | Collection date | Reverse HIA titers with ferret antisera raised against: |                      |
|----------------------------------|----------------|------------------|-----------------|---------------------------------------------------------|----------------------|
|                                  |                |                  |                 | A/Victoria/2570/2019                                    | A/Wisconsin/588/2019 |
|                                  |                |                  |                 | egg                                                     | cell                 |
|                                  |                |                  |                 | fer. 27/20, FCI                                         | fer. 25/20, FCI      |
|                                  |                |                  |                 | 6B.1A.5a.2                                              | 6B.1A.5a.2           |
| <b>Reference strains</b>         |                |                  |                 |                                                         |                      |
| A/Victoria/2570/2019             | 6B.1A.5a.2     | E4/E2/E1         | 22.11.2019      | 640                                                     | 2560                 |
| A/Wisconsin/588/2019             | 6B.1A.5a.2     | C2/SIAT1/MD2/MD1 | 19.12.2019      | 320                                                     | 1280                 |
| <b>Tested strains</b>            |                |                  |                 |                                                         |                      |
| A/Saint-Petersburg/182-b11V/2023 | 6B.1A.5a.2a    | MDCK1            | 13.12.2022      | 1280                                                    | 5120                 |
| A/Vladimir/163-12V/2022          | 6B.1A.5a.2a    | MDCK1            | 05.12.2022      | 1280                                                    | 5120                 |
| A/Cheboksary/293-t2V/2023        | 6B.1A.5a.2a    | MDCK1            | 13.02.2023      | 2560                                                    | 5120                 |
| A/Murmansk/197-16V/2022          | 6B.1A.5a.2a    | MDCK1            | 19.12.2022      | 640                                                     | 2560                 |
| A/Krasnoyarsk/230-1131V/2023     | 6B.1A.5a.2a    | MDCK1            | 29.12.2022      | 1280                                                    | 5120                 |
| A/Tomsk/240-17V/2023             | 6B.1A.5a.2a    | MDCK1            | 12.01.2023      | 1280                                                    | 5120                 |
| A/Buryatia/106-6V/2022           | 6B.1A.5a.2a.1  | MDCK1            | 19.11.2022      | 1280                                                    | 5120                 |
| A/KhMAO/271-39V/2023             | 6B.1A.5a.2a    | MDCK1            | 01.02.2023      | 1280                                                    | 5120                 |
| A/Saratov/181-11V/2022           | Not determined | MDCK1            | 13.12.2022      | 1280                                                    | 5120                 |
| A/KhMAO/271-37V/2023             | 6B.1A.5a.2a    | MDCK1            | 01.02.2023      | 1280                                                    | 5120                 |
| A/Khabarovsk/95-10V/2022         | 6B.1A.5a.2a    | MDCK1            | 28.11.2022      | 1280                                                    | 5120                 |
| A/Stavropol/124-6V/2022          | Not determined | MDCK1            | 28.11.2022      | 2560                                                    | 5120                 |
| A/Kemerovo/154-9V/2022           | Not determined | MDCK1            | 07.12.2022      | 1280                                                    | 5120                 |
| A/Kurgan/145-9V/2022             | Not determined | MDCK1            | 30.11.2022      | 1280                                                    | 2560                 |
| A/Kemerovo/154-10V/2022          | Not determined | MDCK1            | 07.12.2022      | 1280                                                    | 5120                 |
| A/KhMAO/179-15V/2022             | Not determined | MDCK1            | 13.12.2022      | 1280                                                    | 5120                 |
| A/HMAO/207-20V/2023              | 6B.1A.5a.2a    | MDCK1            | 10.12.2022      | 1280                                                    | 5120                 |
| A/Krasnoyarsk/176-18V/2022       | 6B.1A.5a.2a    | MDCK1            | 21.12.2022      | 2560                                                    | 5120                 |
| A/Ekaterinburg/225-17V/2022      | 6B.1A.5a.2a    | MDCK1            | 20.12.2022      | 1280                                                    | 5120                 |
| A/Russia/183-9V/2022             | Not determined | MDCK1            | 15.12.2022      | 1280                                                    | 5120                 |
| A/Saratov/181-12V/2022           | Not determined | MDCK1            | 13.12.2022      | 1280                                                    | 5120                 |
| A/Kemerovo/154-7V/2022           | Not determined | MDCK1            | 05.12.2022      | 1280                                                    | 5120                 |
| A/Kaliningrad/101-117V/2022      | 6B.1A.5a.2a    | MDCK1            | 28.11.2022      | 1280                                                    | 5120                 |
| A/Novosibirsk/198-t22V/2022      | 6B.1A.5a.2a    | MDCK1            | 21.12.2022      | 1280                                                    | 5120                 |
| A/KHMAO/207-t22V/2022            | 6B.1A.5a.2a    | MDCK1            | 16.12.2022      | 1280                                                    | NA                   |
| A/Belgorod/73-6V/2022            | 6B.1A.5a.2a    | MDCK1            | 11.11.2022      | 2560                                                    | NA                   |
| A/Ekaterinburg/111-113V/2023     | 6B.1A.5a.2a    | MDCK1            | 25.11.2022      | 640                                                     | NA                   |
| A/Sakha/164-t7V/2023             | 6B.1A.5a.2a    | MDCK1            | 12.12.2022      | 1280                                                    | NA                   |
| A/Tatarstan/174-1113V/2022       | 6B.1A.5a.2a    | MDCK1            | 08.12.2022      | 1280                                                    | NA                   |
| A/Altai Krai/193-17V/2022        | 6B.1A.5a.2a    | MDCK1            | 20.12.2022      | 1280                                                    | NA                   |
| A/Yaroslavl/128-pl1V/2022        | 6B.1A.5a.2a    | MDCK1            | 06.12.2022      | 1280                                                    | NA                   |
| A/Omsk/203-18V/2022              | 6B.1A.5a.2a    | MDCK1            | 22.12.2022      | 1280                                                    | NA                   |
| A/Omsk/138-17V/2022              | 6B.1A.5a.2a    | MDCK1            | 06.12.2022      | 1280                                                    | NA                   |
| A/Krasnoyarsk/201-t27V/2022      | 6B.1A.5a.2a    | MDCK1            | 19.12.2022      | 2560                                                    | NA                   |

Fold change relative to the homologous titer:

|  |     |
|--|-----|
|  | ≤ 4 |
|  | ≥ 8 |

NA – not assessed

Characterization of influenza A(H1N1)pdm09 viruses in HIA with turkey red blood cells (3)

| Virus                           | Clade       | Passage history  | Collection date | Reverse HIA titers with ferret antisera raised against: |                      |                      |
|---------------------------------|-------------|------------------|-----------------|---------------------------------------------------------|----------------------|----------------------|
|                                 |             |                  |                 | A/Guangdong-Maonan/SWL1536/2019                         | A/Victoria/2570/2019 | A/Wisconsin/588/2019 |
|                                 |             |                  |                 | egg                                                     | egg                  | cell                 |
|                                 |             |                  |                 | fer. 11/20, FCI                                         | fer. 27/20, FCI      | fer. 25/20, FCI      |
|                                 |             |                  |                 | 6B.1A.5a.1                                              | 6B.1A.5a.2           | 6B.1A.5a.2           |
| <b>Reference strains</b>        |             |                  |                 |                                                         |                      |                      |
| A/Guangdong-Maonan/SWL1536/2019 | 6B.1A.5a.1  | Ex/E1            | 17.06.2019      | 5120                                                    | NA                   | NA                   |
| A/Victoria/2570/2019            | 6B.1A.5a.2  | E4/E2/E1         | 22.11.2019      | 640                                                     | 1280                 | 2560                 |
| A/Wisconsin/588/2019            | 6B.1A.5a.2  | C2/SIAT1/MD2/MD1 | 19.12.2019      | 1280                                                    | 320                  | 1280                 |
| <b>Tested strains</b>           |             |                  |                 |                                                         |                      |                      |
| A/Pskov/231-l36V/2023           | 6B.1A.5a.2a | MDCK1            | 26.12.2022      | 320                                                     | 1280                 | 2560                 |
| A/Krasnoyarsk/213am28V/2022     | 6B.1A.5a.2a | MDCK1            | 18.12.2022      | 320                                                     | 1280                 | 5120                 |
| A/Yaroslavl/238-l11V/2023       | 6B.1A.5a.2a | MDCK1            | 24.12.2022      | 320                                                     | 1280                 | 5120                 |
| A/Kaliningrad/243-ls14V/2023    | 6B.1A.5a.2a | MDCK1            | 23.12.2022      | 320                                                     | 1280                 | 5120                 |
| A/Tver/107-t2V/2022             | 6B.1A.5a.2a | MDCK1            | 28.11.2022      | 320                                                     | 1280                 | 5120                 |
| A/Yekaterinburg/111-l11V/2022   | 6B.1A.5a.2a | MDCK1            | 21.11.2022      | 320                                                     | 1280                 | 5120                 |
| A/Vologda/189-t10V/2022         | 6B.1A.5a.2a | MDCK1            | 13.12.2022      | 320                                                     | 2560                 | 5120                 |
| A/Pskov/231-l35V/2023           | 6B.1A.5a.2a | MDCK1            | 26.12.2022      | 320                                                     | 1280                 | 5120                 |
| A/Kaliningrad/217-lps10V/2022   | 6B.1A.5a.2a | MDCK1            | 21.12.2022      | 160                                                     | 1280                 | 5120                 |
| A/HMAO/207-l23V/2022            | 6B.1A.5a.2a | MDCK1            | 29.12.2022      | 320                                                     | 1280                 | 5120                 |
| A/Kaliningrad/252-tb19V/2023    | 6B.1A.5a.2a | MDCK1            | 10.01.2023      | 320                                                     | 1280                 | 5120                 |
| A/Tyumen/185-l13V/2022          | 6B.1A.5a.2a | MDCK1            | 15.12.2022      | 320                                                     | 1280                 | 5120                 |
| A/HMAO/133-lp5V/2023            | 6B.1A.5a.2a | MDCK1            | 30.11.2022      | 160                                                     | 1280                 | 5120                 |
| A/Tyumen/234-l15V/2023          | 6B.1A.5a.2a | MDCK1            | 11.01.2023      | 640                                                     | 640                  | 2560                 |
| A/Saratov/250-rl14V/2023        | 6B.1A.5a.2a | MDCK1            | 12.01.2023      | 320                                                     | 1280                 | 5120                 |
| A/Stavropol/233-l9V/2023        | 6B.1A.5a.2a | MDCK1            | 18.12.2022      | 320                                                     | 1280                 | 5120                 |
| A/Kaliningrad/243-ls15V/2023    | 6B.1A.5a.2a | MDCK1            | 27.12.2022      | 320                                                     | 1280                 | 5120                 |
| A/Orenburg/255-l14V/2023        | 6B.1A.5a.2a | MDCK1            | 09.01.2023      | 320                                                     | 1280                 | 5120                 |
| A/Vologda/168-l8V/2023          | 6B.1A.5a.2a | MDCK1            | 06.12.2022      | 320                                                     | 1280                 | 5120                 |
| A/Irkutsk/236-l15V/2023         | 6B.1A.5a.2a | MDCK1            | 28.12.2022      | 320                                                     | 2560                 | 5120                 |
| A/Novosibirsk/218-sec27V/2022   | 6B.1A.5a.2a | MDCK1            | 09.12.2022      | 320                                                     | 1280                 | 5120                 |

Fold change relative to the homologous titer:

|  |     |
|--|-----|
|  | ≤ 4 |
|  | ≥ 8 |

Characterization of influenza A(H1N1)pdm09 viruses in HIA with turkey red blood cells (4)

| Virus                           | Clade       | Passage history  | Collection date | Reverse HIA titers with ferret antisera raised against: |                      |                      |
|---------------------------------|-------------|------------------|-----------------|---------------------------------------------------------|----------------------|----------------------|
|                                 |             |                  |                 | A/Guangdong-Maonan/SWL1536/2019                         | A/Victoria/2570/2019 | A/Wisconsin/588/2019 |
|                                 |             |                  |                 | egg                                                     | egg                  | cell                 |
|                                 |             |                  |                 | fer. 11/20, FCI                                         | fer. 27/20, FCI      | fer. 25/20, FCI      |
|                                 |             |                  |                 | 6B.1A.5a.1                                              | 6B.1A.5a.2           | 6B.1A.5a.2           |
| Reference strains               |             |                  |                 |                                                         |                      |                      |
| A/Guangdong-Maonan/SWL1536/2019 | 6B.1A.5a.1  | Ex/E1            | 17.06.2019      | 5120                                                    | <320                 | <640                 |
| A/Victoria/2570/2019            | 6B.1A.5a.2  | E4/E2/E1         | 22.11.2019      | 640                                                     | 1280                 | 5120                 |
| A/Wisconsin/588/2019            | 6B.1A.5a.2  | C2/SIAT1/MD2/MD1 | 19.12.2019      | 1280                                                    | 640                  | 2560                 |
| Tested strains                  |             |                  |                 |                                                         |                      |                      |
| A/Chelyabinsk/307-t17V/2023     | 6B.1A.5a.2a | MDCK1            | 08.01.2023      | 320                                                     | 1280                 | 5120                 |
| A/Yaroslavl/301-116V/2023       | 6B.1A.5a.2a | MDCK1            | 18.02.2023      | 320                                                     | 2560                 | 5120                 |
| A/Yaroslavl/301-112V/2023       | 6B.1A.5a.2a | MDCK1            | 18.02.2023      | 320                                                     | 2560                 | 10240                |
| A/Yaroslavl/301-t14V/2023       | 6B.1A.5a.2a | MDCK1            | 18.02.2023      | 320                                                     | 2560                 | 5120                 |
| A/Krasnoyarsk/253-1136V/2023    | 6B.1A.5a.2a | MDCK1            | 10.01.2023      | 320                                                     | 1280                 | 5120                 |
| A/Omsk/295-t12V/2023            | 6B.1A.5a.2a | MDCK1            | 15.02.2023      | 320                                                     | 2560                 | 5120                 |
| A/HMAO/207-b24V/2022            | 6B.1A.5a.2a | MDCK1            | 29.12.2022      | 320                                                     | 1280                 | 5120                 |
| A/Omsk/337-114V/2023            | 6B.1A.5a.2a | MDCK1            | 11.04.2023      | 320                                                     | 1280                 | 5120                 |
| A/Chelyabinsk/322-120V/2023     | 6B.1A.5a.2a | MDCK1            | 13.01.2023      | 320                                                     | 1280                 | 5120                 |
| A/Russia/319-141V/2023          |             | MDCK1            | 18.01.2023      | 320                                                     | 1280                 | 5120                 |

Fold change relative to the homologous titer:

|  |     |
|--|-----|
|  | ≤ 4 |
|  | ≥ 8 |



Characterization of influenza A(H1N1)pdm09 viruses in HIA with turkey red blood cells (5)

| Virus                           | Clade         | Passage history  | Collection date | Reverse HIA titers with ferret antisera raised against: |                      |
|---------------------------------|---------------|------------------|-----------------|---------------------------------------------------------|----------------------|
|                                 |               |                  |                 | A/Guangdong-Maonan/SWL1536/2019                         | A/Wisconsin/588/2019 |
|                                 |               |                  |                 | egg                                                     | cell                 |
|                                 |               |                  |                 | fer. 11/20, FCI                                         | fer. 25/20, FCI      |
|                                 |               |                  |                 | 6B.1A.5a.1                                              | 6B.1A.5a.2           |
| <b>Reference strains</b>        |               |                  |                 |                                                         |                      |
| A/Guangdong-Maonan/SWL1536/2019 | 6B.1A.5a.1    | Ex/E1            | 17.06.2019      | <b>5120</b>                                             | NA                   |
| A/Wisconsin/588/2019            | 6B.1A.5a.2    | C2/SIAT1/MD2/MD1 | 19.12.2019      | NA                                                      | <b>1280</b>          |
| <b>Tested strains</b>           |               |                  |                 |                                                         |                      |
| A/Sakha/164-t7V/2023            | 6B.1A.5a.2a   | MDCK1            | 12.12.2022      | 640                                                     | 10240                |
| A/Tatarstan/174-II13V/2022      | 6B.1A.5a.2a   | MDCK1            | 08.12.2022      | 320                                                     | 10240                |
| A/Novosibirsk/198-t22V/2022     | 6B.1A.5a.2a   | MDCK1            | 21.12.2022      | 320                                                     | 5120                 |
| A/Altai Krai/193-I7V/2022       | 6B.1A.5a.2a   | MDCK1            | 20.12.2022      | 320                                                     | 5120                 |
| A/Buryatia/106-6V/2022          | 6B.1A.5a.2a.1 | MDCK1            | 19.11.2022      | 80                                                      | 5120                 |
| A/KHMAO/207-t22V/2022           | 6B.1A.5a.2a   | MDCK1            | 16.12.2022      | 640                                                     | 5120                 |
| A/Yaroslavl/128-pl1V/2022       | 6B.1A.5a.2a   | MDCK1            | 06.12.2022      | 320                                                     | 5120                 |
| A/Ekaterinburg/111-I13V/2023    | 6B.1A.5a.2a   | MDCK1            | 25.11.2022      | 640                                                     | 2560                 |
| A/Omsk/203-l8V/2022             | 6B.1A.5a.2a   | MDCK1            | 22.12.2022      | 320                                                     | 5120                 |

Fold change relative to the homologous titer:

|  |     |
|--|-----|
|  | ≤ 4 |
|  | ≥ 8 |

Characterization of influenza A(H1N1)pdm09 viruses in HIA with turkey red blood cells (6)

| Virus                           | Clade       | Passage history  | Collection date | Reverse HIA titers with ferret antisera raised against: |                      |                 |
|---------------------------------|-------------|------------------|-----------------|---------------------------------------------------------|----------------------|-----------------|
|                                 |             |                  |                 | A/Guangdong-Maonan/SWL1536/2019                         | A/Wisconsin/588/2019 | A/Darwin/9/2021 |
|                                 |             |                  |                 | egg                                                     | cell                 | egg             |
|                                 |             |                  |                 | fer. 11/20, FCI                                         | fer. 25/20, FCI      | fer. 38/21, FCI |
|                                 |             |                  |                 | 6B.1A.5a.1                                              | 6B.1A.5a.2           | A(H3N2)         |
| <b>Reference strains</b>        |             |                  |                 |                                                         |                      |                 |
| A/Guangdong-Maonan/SWL1536/2019 | 6B.1A.5a.1  | Ex/E1            | 17.06.2019      | <b>10240</b>                                            | 160                  | <20             |
| A/Hawaii/70/2019                | 6B.1A.5a.1  | Cx/MD1           | 05.10.2019      | 10240                                                   | 160                  | <20             |
| A/Wisconsin/588/2019            | 6B.1A.5a.2  | C2/SIAT1/MD2/MD1 | 19.12.2019      | 1280                                                    | <b>2560</b>          | <20             |
| A/Darwin/9/2021                 |             | E3/E2/E1         | 17.04.2021      | NA                                                      | NA                   | <b>2560</b>     |
| <b>Tested strains</b>           |             |                  |                 |                                                         |                      |                 |
| A/Novosibirsk/69-12V/2022       | 6B.1A.5a.2a | MDCK1            | 14.11.2022      | 320                                                     | 10240                | <20             |
| A/Omsk/138-b7V/2022             | 6B.1A.5a.2a | MDCK1            | 06.12.2022      | 320                                                     | 10240                | <20             |
| A/Belgorod/73-6V/2022           | 6B.1A.5a.2a | MDCK1            | 11.11.2022      | 320                                                     | 10240                | <20             |
| A/Krasnoyarsk/201-t27V/2022     | 6B.1A.5a.2a | MDCK1            | 19.12.2022      | 320                                                     | 10240                | <20             |

Fold change relative to the homologous titer:

|  |     |
|--|-----|
|  | ≤ 4 |
|  | ≥ 8 |

NA – not assessed

**Table S2.** Summary table of the A(H1N1)pdm09 HIA results.

The table shows fold change between homologous ferret antiserum titre and titre determined in HIA with tested A(H1N1)pdm09 strains isolated in Russia in 2022-2023 flu season (summary table).

| Fold change between homologous antiserum titre and titre determined in HIA with tested A(H1N1)pdm09 isolate | Number and proportion of A(H1N1)pdm09 isolates with the specified fold change of HIA titre.<br>Ferret antisera raised against: |                                                |                                            |
|-------------------------------------------------------------------------------------------------------------|--------------------------------------------------------------------------------------------------------------------------------|------------------------------------------------|--------------------------------------------|
|                                                                                                             | A/Victoria/2570/2019 (egg <sup>a</sup> ) 5a.2 <sup>b</sup>                                                                     | A/Wisconsin/588/2019 (c.c. <sup>c</sup> ) 5a.2 | A/Guangdong-Maonan/SWL1536/2019 (egg) 5a.1 |
| 0.125                                                                                                       | 0 (0%)                                                                                                                         | 2 (2.9%)                                       | 0 (0%)                                     |
| 0.25                                                                                                        | 4 (5.8%)                                                                                                                       | 49 (71%)                                       | 0 (0%)                                     |
| 0.5                                                                                                         | 33 (47.8%)                                                                                                                     | 17 (24.6%)                                     | 0 (0%)                                     |
| 1                                                                                                           | 29 (42%)                                                                                                                       | 0 (0%)                                         | 0 (0%)                                     |
| 2                                                                                                           | 2 (2.9%)                                                                                                                       | 1 (1.4%)                                       | 0 (0%)                                     |
| 8                                                                                                           | 1 (1.4%)                                                                                                                       | 0 (0%)                                         | 2 (4.3%)                                   |
| 16                                                                                                          | 0 (0%)                                                                                                                         | 0 (0%)                                         | 37 (78.7%)                                 |
| 32                                                                                                          | 0 (0%)                                                                                                                         | 0 (0%)                                         | 6 (12.8%)                                  |
| 64                                                                                                          | 0 (0%)                                                                                                                         | 0 (0%)                                         | 1 (2.1%)                                   |
| >64                                                                                                         | 0 (0%)                                                                                                                         | 0 (0%)                                         | 1 (2.1%)                                   |
| <b>Number and proportion of isolates within the specified range of fold change:</b>                         |                                                                                                                                |                                                |                                            |
| 0.125 - 2                                                                                                   | 68 (98.6%)                                                                                                                     | 69 (100%)                                      | 0 (0%)                                     |
| ≥8                                                                                                          | 1 (1.4%)                                                                                                                       | 0 (0%)                                         | 47 (100%)                                  |
| <b>Total number of tested isolates:</b>                                                                     | 69 (100%)                                                                                                                      | 69 (100%)                                      | 47 (100%)                                  |

<sup>a</sup> – egg-grown virus was used to infect ferret to raise antiserum;

<sup>b</sup> – clade of the virus which was used to infect ferret to raise antiserum;

<sup>c</sup> – cell culture (c.c.) grown virus was used to infect ferret to raise antiserum.

**Table S3.** HIA assay results for the A(H3N2) isolate.

Analysis of A(H3N2) virus isolated in Russia in 2022-2023 in HIA (hemagglutination inhibition assay) with reference ferret antisera. Turkey red blood cells, 20nM oseltamivir

| Virus                    | Clade | Passage history   | Specimen collection date | HIA antiserum titres. Ferret antisera raised against: |                 |                    |
|--------------------------|-------|-------------------|--------------------------|-------------------------------------------------------|-----------------|--------------------|
|                          |       |                   |                          | A/Cambodia/e0826360/2020                              | A/Darwin/9/2021 | A/Stockholm/5/2021 |
|                          |       |                   |                          | egg <sup>a</sup>                                      | egg             | cell <sup>b</sup>  |
|                          |       |                   |                          | fer. 13/21, FCI <sup>c</sup>                          | fer. 38/21, FCI | fer. 35/21, FCI    |
|                          |       |                   |                          | 1a <sup>d</sup>                                       | 2a              | 2a                 |
| <b>Reference strains</b> |       |                   |                          |                                                       |                 |                    |
| A/Cambodia/e0826360/2020 | 1a    | E5 /E2/E1         | 16.07.2020               | <b>5120</b>                                           | 640             | 640                |
| A/Darwin/9/2021          | 2a    | E3/E2 / E1        | 17.04.2021               | 640                                                   | <b>2560</b>     | 1280               |
| A/Stockholm/5/2021       | 2a    | SIAT0/SIAT3/MDCK1 | 16.04.2021               | 160                                                   | 2560            | <b>1280</b>        |
| <b>Tested strain</b>     |       |                   |                          |                                                       |                 |                    |
| A/Khabarovsk/95-5V/2022  | 2b    | MDCK2             | 21.11.2022               | 320                                                   | 640             | 640                |

<sup>a</sup> – egg-grown virus was used to infect ferret to raise antiserum;

<sup>b</sup> – cell-grown virus was used to infect ferret to raise antiserum;

<sup>c</sup> – catalogue number of reference ferret antiserum;

<sup>d</sup> – clade of the virus which was used to infect ferret.

**Table S4.** HIA assay results for individual B/Victoria isolates.

(A) The table shows fold change between homologous ferret antiserum titre and titre determined in HIA with tested A(H1N1)pdm09 strains isolated in Russia in 2022-2023 flu season.

| №  | Tested strains               | Flu vaccination status <sup>a</sup> | Sample collection date | Clade           | Passage history  | Fold change between homologous antiserum titre and the titre determined in HIA with tested strain: |                                    |                                          |                                                    | HA amino acid substitutions compared to B/Austria/1359417/2021 |
|----|------------------------------|-------------------------------------|------------------------|-----------------|------------------|----------------------------------------------------------------------------------------------------|------------------------------------|------------------------------------------|----------------------------------------------------|----------------------------------------------------------------|
|    |                              |                                     |                        |                 |                  | Ferret antiserum against:                                                                          |                                    |                                          |                                                    |                                                                |
|    |                              |                                     |                        |                 |                  | B/Washington/ 02/ 2019 (c.c. <sup>b</sup> ) V1A.3                                                  | B/Washington/ 02/ 2019 (egg) V1A.3 | B/Austria/ 1359417/ 2021 (c.c.) V1A.3a.2 | B/Austria/ 1359417/ 2021, isolate 1 (egg) V1A.3a.2 |                                                                |
| 1  | B/Perm/286-b22V/2023         | NV                                  | 03.02.2023             | V1A.3a.2        | MD1 <sup>c</sup> | 2                                                                                                  | 16                                 | 1                                        | 1                                                  | D197E, R80G, E184K                                             |
| 2  | B/Perm/302-urt26V/2023       | NV                                  | 13.02.2023             | V1A.3a.2        | MD1              | >4 <sup>d</sup>                                                                                    | 16                                 | 1                                        | 1                                                  | E128K, A154E, S208P                                            |
| 3  | B/JAO/331-ll5V/2023          | NV                                  | 04.04.2023             | V1A.3a.2        | MD1              | >4                                                                                                 | 16                                 | 1                                        | 1                                                  | E128K, A154E, S208P                                            |
| 4  | B/Perm/310-b27V/2023         | NV                                  | 01.03.2023             | V1A.3a.2        | MD1              | 4                                                                                                  | 16                                 | 1                                        | 1                                                  | D197E, E128K                                                   |
| 5  | B/Orenburg/36-1V/2022        | NV                                  | 21.10.2022             | V1A.3a.2        | MD1              | 2                                                                                                  | 16                                 | 1                                        | 1                                                  | D197E, R80G, E184K, R498K                                      |
| 6  | B/KhMAO/329-76V/2023         | V                                   | 24.03.2023             | ND <sup>e</sup> | MD1              | 4                                                                                                  | 16                                 | 1                                        | 1                                                  | H.II.                                                          |
| 7  | B/KhMAO/328-71V/2023         | V                                   | 29.03.2023             | ND              | MD1              | >4                                                                                                 | 16                                 | 1                                        | 1                                                  | H.II.                                                          |
| 8  | B/Krasnodar/27-1V/2022       | Unk.                                | 24.10.2022             | V1A.3a.2        | MD1              | 1                                                                                                  | 8                                  | 1                                        | 0.5                                                | D197E, R80G, E184K, A66S, R498K                                |
| 9  | B/Tyumen/288-24V/2023        | NV                                  | 02.02.2023             | V1A.3a.2        | MD1              | 1                                                                                                  | 8                                  | 1                                        | 0.5                                                | D197E, R80G, E184K                                             |
| 10 | B/KhMAO/303-51V/2023         | NV                                  | 14.02.2023             | V1A.3a.2        | MD1              | >2                                                                                                 | 8                                  | 1                                        | 1                                                  | E128K, A154E, S208P, V87I, T121N                               |
| 11 | B/Yekaterinburg/281-19V/2023 | NV                                  | 25.01.2023             | ND              | MD1              | 1                                                                                                  | 8                                  | 1                                        | 0.5                                                | H.II.                                                          |
| 12 | B/Kalmykia/330-153V/2023     | NV                                  | 27.03.2023             | V1A.3a.2        | MD1              | >2                                                                                                 | 8                                  | 1                                        | 0.5                                                | E128K, A154E, S208P                                            |

|    |                              |    |            |          |     |    |    |   |     |                            |
|----|------------------------------|----|------------|----------|-----|----|----|---|-----|----------------------------|
| 13 | B/KhMAO/325-64V/2023         | V  | 20.03.2023 | V1A.3a.2 | MD1 | >2 | 8  | 1 | 0.5 | E128K, A154E, S208P, Y309H |
| 14 | B/Yekaterinburg/281-20V/2023 | NV | 25.01.2023 | ND       | MD1 | >2 | 8  | 1 | 0.5 | H.И.                       |
| 15 | B/KhMAO/324-63V/2023         | NV | 18.03.2023 | V1A.3a.2 | MD1 | >2 | 8  | 1 | 0.5 | E128K, A154E, S208P, Y309H |
| 16 | B/KhMAO/339-78V/2023         | V  | 10.04.2023 | ND       | MD1 | >2 | 8  | 1 | 1   | H.И.                       |
| 17 | B/Lipetsk/316-1.1V/2023      | NV | 09.03.2023 | ND       | MD1 | >2 | 8  | 1 | 0.5 | H.И.                       |
| 18 | B/Omsk/54-1V/2022            | NV | 15.11.2022 | V1A.3a.2 | MD1 | 1  | 8  | 1 | 0.5 | D197E, R80G, E184K         |
| 19 | B/Novosibirsk/57-9V/2022     | NV | 08.11.2022 | V1A.3a.2 | MD1 | >2 | 16 | 1 | 0.5 | D197E, R80G, E184K, E128K  |
| 20 | B/Vologda/102-5V/2022        | NV | 18.11.2022 | V1A.3a.2 | MD1 | >2 | 8  | 1 | 0.5 | D197E, S567T               |
| 21 | B/KhMAO/325-66V/2023         | V  | 18.03.2023 | V1A.3a.2 | MD1 | >2 | 8  | 1 | 1   | E128K, A154E, S208P        |
| 22 | B/KhMAO/325-65V/2023         | V  | 20.03.2023 | V1A.3a.2 | MD1 | >2 | 8  | 1 | 1   | E128K, A154E, S208P, Y309H |
| 23 | B/Tyumen/288-25V/2023        | NV | 09.02.2023 | V1A.3a.2 | MD1 | >2 | 8  | 1 | 1   | E128K, A154E, S208P, G528E |

<sup>a</sup> – Flu vaccination status: V – vaccinated, NV – not vaccinated, Unk. - unknown;

<sup>b</sup> – c.c. – antiserum against the cell culture-grown virus;

<sup>c</sup> – MD – MDCK cell culture;

<sup>d</sup> – titre fold difference was not determined precisely because of the low homologous titre of anti-B/Washington/02/2019 (c.c.) (1/40);

<sup>e</sup> – ND – not determined.

**(B)** Characterization of influenza B/Victoria viruses in HIA with turkey red blood cells (1).

| Virus                  | Clade          | Passage history | Collection date | Reverse HIA titers with ferret antisera raised against: |                          |                            |                                          |                        |
|------------------------|----------------|-----------------|-----------------|---------------------------------------------------------|--------------------------|----------------------------|------------------------------------------|------------------------|
|                        |                |                 |                 | B/Washington/<br>02/2019                                | B/Washington/<br>02/2019 | B/Austria/<br>1359417/2021 | B/Austria/<br>1359417/2021,<br>isolate 1 | B/Phuket/<br>3073/2013 |
|                        |                |                 |                 | cell                                                    | egg                      | cell                       | egg                                      | egg                    |
|                        |                |                 |                 | fer. 37/19,<br>FCI*                                     | fer. 38/19,<br>FCI       | fer. 22/21,<br>FCI         | fer. 15/21,<br>FCI                       | fer. 22/18, FCI        |
|                        |                |                 |                 | B/Victoria                                              | B/Victoria               | B/Victoria                 | B/Victoria                               | B/Yamagata             |
|                        |                |                 |                 | V1A.3                                                   | V1A.3                    | V1A.3a.2                   | V1A.3a.2                                 |                        |
| Reference strains      |                |                 |                 |                                                         |                          |                            |                                          |                        |
| B/Washington/02/2019   | V1A.3          | Cx/MD1          | 19.01.2019      | 80                                                      | 640                      | 20                         | 80                                       | <40                    |
| B/Washington/02/2019   | V1A.3          | Ex/E1           | 19.01.2019      | 80                                                      | 1280                     | 20                         | 80                                       | <40                    |
| B/Austria/1359417/2021 | V1A.3a.2       | SIAT1/MD4/MD1   | 09.01.2021      | 40                                                      | 80                       | 1280                       | 2560                                     | <40                    |
| B/Austria/1359417/2021 | V1A.3a.2       | Ex/E1           | 09.01.2021      | 40                                                      | 80                       | 640                        | 2560                                     | <40                    |
| B/Phuket/3073/2013     |                | Ex/E1           |                 | <20                                                     | <20                      | <20                        | 40                                       | 640                    |
| Tested strains         |                |                 |                 |                                                         |                          |                            |                                          |                        |
| B/Perm/286-b22V/2023   | V1A.3a.2       | MDCK1           | 03.02.2023      | 40                                                      | 80                       | 1280                       | 2560                                     | <40                    |
| B/Perm/302-urt26V/2023 | V1A.3a.2       | MDCK1           | 13.02.2023      | <20                                                     | 80                       | 1280                       | 2560                                     | <40                    |
| B/JAO/331-II5V/2023    | V1A.3a.2       | MDCK1           | 04.04.2023      | <20                                                     | 80                       | 1280                       | 2560                                     | <40                    |
| B/Perm/310-b27V/2023   | V1A.3a.2       | MDCK1           | 01.03.2023      | 20                                                      | 80                       | 1280                       | 2560                                     | <40                    |
| B/Orenburg/36-1V/2022  | V1A.3a.2       | MDCK1           | 21.10.2022      | 40                                                      | 80                       | 1280                       | 2560                                     | <40                    |
| B/KhMAO/329-76V/2023   | Not determined | MDCK1           | 24.03.2023      | 20                                                      | 80                       | 1280                       | 2560                                     | <40                    |
| B/KhMAO/328-71V/2023   | Not determined | MDCK1           | 29.03.2023      | <20                                                     | 80                       | 1280                       | 2560                                     | <40                    |

\* - Catalogue number of ferret antisera provided by the Francis Crick Institute (FCI) in 2021

Fold change relative to the homologous titer:

|  |     |
|--|-----|
|  | ≤ 4 |
|  | ≥ 8 |

Characterization of influenza B/Victoria viruses in HIA with turkey red blood cells (2).

| Strain                       | Clade          | Passage history | Collection date | Reverse HIA titers with ferret antisera raised against: |                      |                        |                                   |
|------------------------------|----------------|-----------------|-----------------|---------------------------------------------------------|----------------------|------------------------|-----------------------------------|
|                              |                |                 |                 | B/Washington/02/2019                                    | B/Washington/02/2019 | B/Austria/1359417/2021 | B/Austria/1359417/2021, isolate 1 |
|                              |                |                 |                 | cell                                                    | egg                  | cell                   | egg                               |
|                              |                |                 |                 | fer. 37/19, FCI*                                        | fer. 38/19, FCI      | fer. 22/21, FCI        | fer. 15/21, FCI                   |
|                              |                |                 |                 | B/Vic                                                   | B/Vic                | B/Vic                  | B/Vic                             |
|                              |                |                 |                 | V1A.3                                                   | V1A.3                | V1A.3a.2               | V1A.3a.2                          |
| <b>Reference strains</b>     |                |                 |                 |                                                         |                      |                        |                                   |
| B/Washington/02/2019         | V1A.3          | Cx/MD1          | 19.01.2019      | 40                                                      | 320                  | <160                   | <160                              |
| B/Washington/02/2019         | V1A.3          | Ex/E1           | 19.01.2019      | 40                                                      | 640                  | <160                   | <160                              |
| B/Austria/1359417/2021       | V1A.3a.2       | SIAT1/MD4/MD1   | 09.01.2021      | 40                                                      | 80                   | 1280                   | 2560                              |
| B/Austria/1359417/2021       | V1A.3a.2       | Ex/E1           | 09.01.2021      | 20                                                      | 40                   | 640                    | 1280                              |
| <b>Tested strains</b>        |                |                 |                 |                                                         |                      |                        |                                   |
| B/Krasnodar/27-1V/2022       | V1A.3a.2       | MDCK1           | 24.10.2022      | 40                                                      | 80                   | 1280                   | 2560                              |
| B/Tyumen/288-24V/2023        | V1A.3a.2       | MDCK1           | 02.02.2023      | 40                                                      | 80                   | 1280                   | 2560                              |
| B/KhMAO/303-51V/2023         | V1A.3a.2       | MDCK1           | 14.02.2023      | <20                                                     | 80                   | 1280                   | 1280                              |
| B/Yekaterinburg/281-19V/2023 | Not determined | MDCK1           | 25.01.2023      | 40                                                      | 80                   | 1280                   | 2560                              |
| B/Kalmykia/330-153V/2023     | V1A.3a.2       | MDCK1           | 27.03.2023      | <20                                                     | 80                   | 1280                   | 2560                              |
| B/KhMAO/325-64V/2023         | V1A.3a.2       | MDCK1           | 20.03.2023      | <20                                                     | 80                   | 1280                   | 2560                              |
| B/Yekaterinburg/281-20V/2023 | Not determined | MDCK1           | 25.01.2023      | <20                                                     | 80                   | 1280                   | 2560                              |
| B/KhMAO/324-63V/2023         | V1A.3a.2       | MDCK1           | 18.03.2023      | <20                                                     | 80                   | 1280                   | 2560                              |
| B/KhMAO/339-78V/2023         | Not determined | MDCK1           | 10.04.2023      | <20                                                     | 80                   | 1280                   | 1280                              |
| B/Lipetsk/316-1.1V/2023      | Not determined | MDCK1           | 09.03.2023      | <20                                                     | 80                   | 1280                   | 2560                              |
| B/Omsk/54-1V/2022            | V1A.3a.2       | MDCK1           | 15.11.2022      | 40                                                      | 80                   | 1280                   | 2560                              |
| B/Novosibirsk/57-9V/2022     | V1A.3a.2       | MDCK1           | 08.11.2022      | <20                                                     | 40                   | 1280                   | 2560                              |
| B/Vologda/102-5V/2022        | V1A.3a.2       | MDCK1           | 18.11.2022      | <20                                                     | 80                   | 1280                   | 2560                              |
| B/KhMAO/325-66V/2023         | V1A.3a.2       | MDCK1           | 18.03.2023      | <20                                                     | 80                   | 1280                   | 1280                              |
| B/KhMAO/325-65V/2023         | V1A.3a.2       | MDCK1           | 20.03.2023      | <20                                                     | 80                   | 1280                   | 1280                              |
| B/Tyumen/288-25V/2023        | V1A.3a.2       | MDCK1           | 09.02.2023      | <20                                                     | 80                   | 1280                   | 1280                              |

\* - Catalogue number of ferret antisera provided by the Francis Crick Institute (FCI) in 2021

Fold change relative to the homologous titer:

|  |     |
|--|-----|
|  | ≤ 4 |
|  | ≥ 8 |



**Table S5.** Summary table of the B/Victoria HIA results.

Fold change between homologous ferret antiserum titre and titre determined in HIA with tested B/Victoria viruses isolated in Russia in 2022-2023 flu season (summary table).

| <b>Fold change between homologous antiserum titre and titre determined in HIA with tested B/Victoria isolate</b> | <b>Number and proportion of B/Victoria isolates with the specified fold change of HIA titre.</b> |                                                     |                                             |                                                       |
|------------------------------------------------------------------------------------------------------------------|--------------------------------------------------------------------------------------------------|-----------------------------------------------------|---------------------------------------------|-------------------------------------------------------|
|                                                                                                                  | <b>Ferret antisera raised against:</b>                                                           |                                                     |                                             |                                                       |
|                                                                                                                  | Anti-B/Washington/02/2019 (c.c. <sup>b</sup> ) V1A.3 <sup>c</sup>                                | Anti-B/Washington/02/2019 (egg <sup>d</sup> ) V1A.3 | Anti-B/Austria/1359417/2021 (c.c.) V1A.3a.2 | Anti-B/Austria/1359417/2021, isolate 1 (egg) V1A.3a.2 |
| 0.5                                                                                                              | 0 (0%)                                                                                           | 0 (0%)                                              | 0 (0%)                                      | 11 (47.8%)                                            |
| 1                                                                                                                | 4 (17.4%)                                                                                        | 0 (0%)                                              | 23 (100%)                                   | 12 (52.2%)                                            |
| 2                                                                                                                | 2 (8.7%)                                                                                         | 0 (0%)                                              | 0 (0%)                                      | 0 (0%)                                                |
| 4                                                                                                                | 2 (8.7%)                                                                                         | 0 (0%)                                              | 0 (0%)                                      | 0 (0%)                                                |
| 8                                                                                                                | 0 (0%)                                                                                           | 15 (65.2%)                                          | 0 (0%)                                      | 0 (0%)                                                |
| 16                                                                                                               | 0 (0%)                                                                                           | 8 (34.8%)                                           | 0 (0%)                                      | 0 (0%)                                                |
| >2 <sup>a</sup>                                                                                                  | 12 (52.2%)                                                                                       | 0 (0%)                                              | 0 (0%)                                      | 0 (0%)                                                |
| >4 <sup>a</sup>                                                                                                  | 3 (13%)                                                                                          | 0 (0%)                                              | 0 (0%)                                      | 0 (0%)                                                |
| <b>Number and proportion of isolates within the specified range of fold change:</b>                              |                                                                                                  |                                                     |                                             |                                                       |
| ≤ 4                                                                                                              | 8 (34.8%)                                                                                        | 0 (0%)                                              | 23 (100%)                                   | 23 (100%)                                             |
| >4                                                                                                               | 3 (13%)                                                                                          | 23 (100%)                                           | 0 (0%)                                      | 0 (0%)                                                |
| <b>Total number of tested isolates:</b>                                                                          | 23 (100%)                                                                                        | 23 (100%)                                           | 23 (100%)                                   | 23 (100%)                                             |

<sup>a</sup> – titre fold difference was not determined precisely because of the low homologous titre of anti-B/Washington/02/2019 (c.c.) (1/40);

<sup>b</sup> – c.c. – antiserum against the cell culture-grown virus;

<sup>c</sup> – clade of the virus which was used to infect ferret to raise antiserum;

<sup>d</sup> – antiserum raised against the egg-grown virus.

**Table S6.** Analysis of the 222D/G/N polymorphism in the A(H1N1)pdm09 virus samples (D222G/N substitutions in the major virus variant of the samples).

| Virus specimen                                | Virus source        | Specimen type | 222D (GAT) | 222N (AAT)  | 222G (GGT)  | NGS coverage <sup>#</sup> |
|-----------------------------------------------|---------------------|---------------|------------|-------------|-------------|---------------------------|
| <i>Viruses from cases with fatal outcomes</i> |                     |               |            |             |             |                           |
| A/Kaliningrad/101-117V/2022                   | lung                | Original      | 16.6       | <b>67.6</b> | 6.3         | 13675                     |
| A/Tver/107-11V/2022                           | lung                | Original      | 36.2       | <b>43.3</b> | 15.9        | 13382                     |
| A/Omsk/138-b7V/2022                           | bronchi             | Original      | 38         | <b>56.7</b> | 0.3         | 1486                      |
| A/Vladimir/163-12V/2022                       | lung                | Original      | 5.6        | <b>78.1</b> | 9.5         | 1508                      |
| A/Saratov/181-113V/2022                       | lung                | Original      | 0.5        | <b>94.7</b> | -           | 56878                     |
| A/Novosibirsk/198-t22V/2022                   | trachea             | Isolate       | 0.3        | <b>95.1</b> | -           | 22388                     |
| A/Tyumen/185-113V/2022                        | lung                | Isolate       | 0.3        | <b>94.3</b> | 1           | 50856                     |
| A/Murmansk/197-16V/2022                       | lung                | Isolate       | 0.2        | <b>95</b>   | -           | 42544                     |
| A/Kaliningrad/217-lps10V/2022                 | lung                | Isolate       | 0.2        | <b>90.1</b> | 4.9         | 51878                     |
| A/Omsk/203-18V/2022                           | lung                | Isolate       | 19         | <b>72.9</b> | 3.1         | 70736                     |
| A/Yaroslavl/128-pl1V/2022                     | lung                | Isolate       | 0.2        | <b>95.2</b> | -           | 28740                     |
| A/Sakhalin/210-1158V/2022                     | lung                | Isolate       | 0.3        | <b>95.5</b> | -           | 94786                     |
| A/Krasnoyarsk/119-1110V/2022                  | lung                | Isolate       | 22.6       | <b>71</b>   | 1.3         | 36424                     |
| A/Tyumen/234-115V/2023                        | lung                | Isolate       | 0.3        | <b>87.2</b> | 5.6         | 29592                     |
| A/Saint-Petersburg/182-b11V/2023              | bronchi             | Isolate       | 28.8       | <b>65.1</b> | -           | 40862                     |
| A/Pskov/231-135V/2023                         | lung                | Isolate       | 8.9        | <b>83.9</b> | -           | 27700                     |
| A/Kaliningrad/243-ls14V/2023                  | lung                | Isolate       | 0.2        | <b>95.6</b> | -           | 13582                     |
| A/Krasnoyarsk/230-1130V/2022                  | lung                | Original      | 37.3       | <b>59.6</b> | 0.3         | 1657                      |
| A/Khakasia/257-118V/2023                      | lung                | Original      | 24.6       | <b>51.8</b> | 22.6        | 38580                     |
| A/Tomsk/299-113V/2023                         | lung                | Original      | 0.9        | <b>98</b>   | -           | 17758                     |
| A/KhMAO/272-141V/2023                         | lung                | Original      | 23.4       | <b>52.1</b> | 23.8        | 1314                      |
| A/Russia/319-141V/2023                        | lung                | Original      | 7.6        | <b>76.3</b> | 15.0        | 3199                      |
| A/Chelyabinsk/322-120V/2023                   | lung                | Original      | -          | <b>99</b>   | 0.2         | 4991                      |
| A/Russia/319-140V/2023                        | lung                | Original      | 0.2        | <b>98.3</b> | -           | 49440                     |
| A/Chelyabinsk/307-t17V/2023                   | lung                | Isolate       | 5.7        | <b>94.3</b> | -           | 194                       |
| A/Novosibirsk/218-sec27V/2022                 | autopsy material    | Isolate       | 1.9        | 20.3        | <b>72.9</b> | 32986                     |
| A/KHMAO/207-t22V/2022                         | trachea             | Isolate       | 0.1        | -           | <b>94.2</b> | 20166                     |
| <i>Virus from case with recovery</i>          |                     |               |            |             |             |                           |
| A/Orenburg/204-2V/2022                        | Nasopharyngeal swab | Isolate       | 0.4        | <b>98.6</b> | -           | 49672                     |

The table shows the percentage of virus variants with the mutations in the sample.

#-coverage is the total number of NGS sequences (reads) at amino acid position 222 in HA.

**Table S7.** IC<sub>50</sub> of NAIs determined for isolated seasonal influenza viruses.

| №  | Virus                            | Type/subtype  | Specimen collection date | Oseltamivir           |                            | Zanamivir             |               |
|----|----------------------------------|---------------|--------------------------|-----------------------|----------------------------|-----------------------|---------------|
|    |                                  |               |                          | IC <sub>50</sub> , nM | NA inhibition <sup>a</sup> | IC <sub>50</sub> , nM | NA inhibition |
|    | <b>Reference viruses</b>         |               |                          |                       |                            |                       |               |
| 1  | A/California/04/2009             | A(H1N1) pdm09 | -                        | 0.20                  | NI                         | 0.30                  | NI            |
| 2  | A/North Carolina/39/2009 (H275Y) | A(H1N1) pdm09 | -                        | 113.17                | HRI                        | 0.42                  | NI            |
| 3  | B/Phuket/3073/2013               | B/Yamagata    | -                        | 9.70                  | NI                         | 1.58                  | NI            |
|    | <b>Tested viruses</b>            |               |                          |                       |                            |                       |               |
| 1  | A/Buryatia/106-6V/2022           | A/H1N1pdm09   | 19.11.2022               | 0.25                  | NI                         | 0.34                  | NI            |
| 2  | A/Yekaterinburg/111-111V/2022    | A/H1N1pdm09   | 21.11.2022               | 0.26                  | NI                         | 0.38                  | NI            |
| 3  | A/Ekaterinburg/111-113V/2023     | A/H1N1pdm09   | 25.11.2022               | 0.27                  | NI                         | 0.30                  | NI            |
| 4  | A/Krasnoyarsk/119-1110V/2022     | A/H1N1pdm09   | 02.12.2022               | 0.16                  | NI                         | 0.31                  | NI            |
| 5  | A/Yaroslavl/128-pl1V/2022        | A/H1N1pdm09   | 06.12.2022               | 0.25                  | NI                         | 0.38                  | NI            |
| 6  | A/HMAO/133-lp5V/2023             | A/H1N1pdm09   | 30.11.2022               | 0.25                  | NI                         | 0.38                  | NI            |
| 7  | A/Omsk/138-17V/2022              | A/H1N1pdm09   | 06.12.2022               | 0.22                  | NI                         | 0.38                  | NI            |
| 8  | A/Ulyanovsk/140-1V/2022          | A/H1N1pdm09   | 06.12.2022               | 0.19                  | NI                         | 0.33                  | NI            |
| 9  | A/Gornoaltaisk/144-3V/2022       | A/H1N1pdm09   | 01.12.2022               | 0.25                  | NI                         | 0.33                  | NI            |
| 10 | A/Kurgan/145-9V/2022             | A/H1N1pdm09   | 30.11.2022               | 0.20                  | NI                         | 0.28                  | NI            |
| 11 | A/Kemerovo/154-10V/2022          | A/H1N1pdm09   | 07.12.2022               | 0.17                  | NI                         | 0.27                  | NI            |
| 12 | A/Kemerovo/154-12V/2022          | A/H1N1pdm09   | 07.12.2022               | 0.22                  | NI                         | 0.23                  | NI            |
| 13 | A/Kemerovo/154-7V/2022           | A/H1N1pdm09   | 05.12.2022               | 0.22                  | NI                         | 0.28                  | NI            |
| 14 | A/Kemerovo/154-9V/2022           | A/H1N1pdm09   | 07.12.2022               | 0.21                  | NI                         | 0.30                  | NI            |
| 15 | A/Vladimir/163-12V/2022          | A/H1N1pdm09   | 05.12.2022               | 0.18                  | NI                         | 0.24                  | NI            |
| 16 | A/Sakha/164-t7V/2023             | A/H1N1pdm09   | 12.12.2022               | 0.24                  | NI                         | 0.34                  | NI            |
| 17 | A/Vologda/168-18V/2023           | A/H1N1pdm09   | 06.12.2022               | 0.46                  | NI                         | 0.51                  | NI            |
| 18 | A/Tatarstan/174-1113V/2022       | A/H1N1pdm09   | 08.12.2022               | 0.38                  | NI                         | 0.63                  | NI            |

|    |                               |             |            |      |    |      |    |
|----|-------------------------------|-------------|------------|------|----|------|----|
| 19 | A/KhMAO/179-15V/2022          | A/H1N1pdm09 | 13.12.2022 | 0.22 | NI | 0.37 | NI |
| 20 | A/Saratov/181-11V/2022        | A/H1N1pdm09 | 13.12.2022 | 0.21 | NI | 0.26 | NI |
| 21 | A/Saratov/181-12V/2022        | A/H1N1pdm09 | 13.12.2022 | 0.21 | NI | 0.28 | NI |
| 22 | A/Russia/183-9V/2022          | A/H1N1pdm09 | 15.12.2022 | 0.26 | NI | 0.42 | NI |
| 23 | A/Tyumen/185-113V/2022        | A/H1N1pdm09 | 15.12.2022 | 0.34 | NI | 0.41 | NI |
| 24 | A/Vologda/189-t10V/2022       | A/H1N1pdm09 | 13.12.2022 | 0.23 | NI | 0.34 | NI |
| 25 | A/Novosibirsk/192-t21V/2022   | A/H1N1pdm09 | 19.12.2022 | 0.23 | NI | 0.31 | NI |
| 26 | A/Altai Krai/193-17V/2022     | A/H1N1pdm09 | 20.12.2022 | 0.31 | NI | 0.36 | NI |
| 27 | A/Murmansk/197-16V/2022       | A/H1N1pdm09 | 19.12.2022 | 0.23 | NI | 0.28 | NI |
| 28 | A/Novosibirsk/198-t22V/2022   | A/H1N1pdm09 | 21.12.2022 | 0.24 | NI | 0.31 | NI |
| 29 | A/Krasnoyarsk/201-22V/2022    | A/H1N1pdm09 | 27.12.2022 | 0.35 | NI | 0.36 | NI |
| 30 | A/Krasnoyarsk/201-24V/2022    | A/H1N1pdm09 | 21.12.2022 | 0.25 | NI | 0.32 | NI |
| 31 | A/Krasnoyarsk/201-t27V/2022   | A/H1N1pdm09 | 19.12.2022 | 0.28 | NI | 0.29 | NI |
| 32 | A/Omsk/203-l8V/2022           | A/H1N1pdm09 | 22.12.2022 | 0.25 | NI | 0.37 | NI |
| 33 | A/Orenburg/204-2V/2022        | A/H1N1pdm09 | 28.12.2022 | 0.25 | NI | 0.30 | NI |
| 34 | A/Orenburg/204-4V/2022        | A/H1N1pdm09 | 21.12.2022 | 0.27 | NI | 0.36 | NI |
| 35 | A/Orenburg/204-7V/2022        | A/H1N1pdm09 | 22.12.2022 | 0.23 | NI | 0.32 | NI |
| 36 | A/HMAO/207-l23V/2022          | A/H1N1pdm09 | 29.12.2022 | 0.16 | NI | 0.26 | NI |
| 37 | A/HMAO/207-20V/2023           | A/H1N1pdm09 | 10.12.2022 | 0.26 | NI | 0.31 | NI |
| 38 | A/HMAO/207-b24V/2022          | A/H1N1pdm09 | 29.12.2022 | 0.85 | NI | 2.34 | NI |
| 39 | A/KHMAO/207-t22V/2022         | A/H1N1pdm09 | 16.12.2022 | 0.28 | NI | 0.39 | NI |
| 40 | A/Sakhalin/210-l158V/2022     | A/H1N1pdm09 | 29.12.2022 | 0.22 | NI | 0.34 | NI |
| 41 | A/Krasnoyarsk/213am28V/2022   | A/H1N1pdm09 | 18.12.2022 | 0.25 | NI | 0.34 | NI |
| 42 | A/Kaliningrad/217-lps10V/2022 | A/H1N1pdm09 | 21.12.2022 | 0.19 | NI | 0.33 | NI |
| 43 | A/Novosibirsk/218-sec27V/2022 | A/H1N1pdm09 | 09.12.2022 | 0.15 | NI | 0.29 | NI |
| 44 | A/Ekaterinburg/225-17V/2022   | A/H1N1pdm09 | 20.12.2022 | 0.21 | NI | 0.32 | NI |
| 45 | A/Krasnoyarsk/230-l131V/2023  | A/H1N1pdm09 | 29.12.2022 | 0.27 | NI | 0.30 | NI |
| 46 | A/Pskov/231-l35V/2023         | A/H1N1pdm09 | 26.12.2022 | 0.25 | NI | 0.29 | NI |

|    |                              |             |            |      |    |      |    |
|----|------------------------------|-------------|------------|------|----|------|----|
| 47 | A/Pskov/231-136V/2023        | A/H1N1pdm09 | 26.12.2022 | 0.27 | NI | 0.36 | NI |
| 48 | A/Stavropol/233-19V/2023     | A/H1N1pdm09 | 18.12.2022 | 0.17 | NI | 0.29 | NI |
| 49 | A/Irkutsk/236-115V/2023      | A/H1N1pdm09 | 28.12.2022 | 0.28 | NI | 0.36 | NI |
| 50 | A/Yaroslavl/238-111V/2023    | A/H1N1pdm09 | 24.12.2022 | 0.28 | NI | 0.39 | NI |
| 51 | A/Tomsk/240-17V/2023         | A/H1N1pdm09 | 12.01.2023 | 0.23 | NI | 0.31 | NI |
| 52 | A/Kaliningrad/243-1s14V/2023 | A/H1N1pdm09 | 23.12.2022 | 0.22 | NI | 0.28 | NI |
| 53 | A/Kaliningrad/243-1s15V/2023 | A/H1N1pdm09 | 27.12.2022 | 0.29 | NI | 0.33 | NI |
| 54 | A/Saratov/250-r114V/2023     | A/H1N1pdm09 | 12.01.2023 | 0.20 | NI | 0.28 | NI |
| 55 | A/Kaliningrad/252-tb19V/2023 | A/H1N1pdm09 | 10.01.2023 | 0.24 | NI | 0.28 | NI |
| 56 | A/Krasnoyarsk/253-1l36V/2023 | A/H1N1pdm09 | 10.01.2023 | 0.20 | NI | 0.24 | NI |
| 57 | A/KhMAO/271-39V/2023         | A/H1N1pdm09 | 01.02.2023 | 0.12 | NI | 0.28 | NI |
| 58 | A/Ulyanovsk/280-3V/2023      | A/H1N1pdm09 | 18.01.2023 | 0.15 | NI | 0.26 | NI |
| 59 | A/Ulyanovsk/280-4V/2023      | A/H1N1pdm09 | 18.01.2023 | 0.20 | NI | 0.29 | NI |
| 60 | A/KhMAO/284-45V/2023         | A/H1N1pdm09 | 30.01.2023 | 0.23 | NI | 0.40 | NI |
| 61 | A/Omsk/295-t12V/2023         | A/H1N1pdm09 | 15.02.2023 | 0.22 | NI | 0.31 | NI |
| 62 | A/Yarosavl/301-112V/2023     | A/H1N1pdm09 | 18.02.2023 | 0.25 | NI | 0.35 | NI |
| 63 | A/Yarosavl/301-t14V/2023     | A/H1N1pdm09 | 18.02.2023 | 0.22 | NI | 0.31 | NI |
| 64 | A/Yaroslavl/301-116V/2023    | A/H1N1pdm09 | 18.02.2023 | 0.24 | NI | 0.31 | NI |
| 65 | A/Chelyabinsk/307-t17V/2023  | A/H1N1pdm09 | 08.01.2023 | 0.19 | NI | 0.29 | NI |
| 66 | A/Russia/319-141V/2023       | A/H1N1pdm09 | 18.01.2023 | 0.19 | NI | 0.30 | NI |
| 67 | A/Chelyabinsk/322-120V/2023  | A/H1N1pdm09 | 13.01.2023 | 0.16 | NI | 0.28 | NI |
| 68 | A/Omsk/337-114V/2023         | A/H1N1pdm09 | 11.04.2023 | 0.19 | NI | 0.28 | NI |
| 69 | A/Novosibirsk/57-8V/2022     | A/H1N1pdm09 | 10.11.2022 | 0.22 | NI | 0.36 | NI |
| 70 | A/NizhnyNovgorod/67-3V/2022  | A/H1N1pdm09 | 15.11.2022 | 0.22 | NI | 0.35 | NI |
| 71 | A/Novosibirsk/69-12V/2022    | A/H1N1pdm09 | 14.11.2022 | 0.25 | NI | 0.36 | NI |
| 72 | A/Belgorod/73-3V/2022        | A/H1N1pdm09 | 11.11.2022 | 0.21 | NI | 0.36 | NI |
| 73 | A/Belgorod/73-4V/2022        | A/H1N1pdm09 | 15.11.2022 | 0.27 | NI | 0.39 | NI |
| 74 | A/Belgorod/73-6V/2022        | A/H1N1pdm09 | 11.11.2022 | 0.22 | NI | 0.35 | NI |

|     |                              |             |            |       |    |      |    |
|-----|------------------------------|-------------|------------|-------|----|------|----|
| 75  | A/Kurgan/76-2V/2022          | A/H1N1pdm09 | 11.11.2022 | 0.23  | NI | 0.33 | NI |
| 76  | A/Chita/77-1V/2022           | A/H1N1pdm09 | 12.11.2022 | 0.20  | NI | 0.27 | NI |
| 77  | A/Chita/77-2V/2022           | A/H1N1pdm09 | 16.11.2022 | 0.19  | NI | 0.29 | NI |
| 78  | A/Chita/77-4V/2022           | A/H1N1pdm09 | 14.11.2022 | 0.18  | NI | 0.32 | NI |
| 79  | A/Rostov/79-6V/2022          | A/H1N1pdm09 | 18.11.2022 | 0.23  | NI | 0.33 | NI |
| 80  | A/Yekaterinburg/85-3V/2022   | A/H1N1pdm09 | 17.11.2022 | 0.21  | NI | 0.35 | NI |
| 81  | A/Yekaterinburg/85-4V/2022   | A/H1N1pdm09 | 21.11.2022 | 0.18  | NI | 0.37 | NI |
| 82  | A/Krasnoyarsk/87-1V/2022     | A/H1N1pdm09 | 17.11.2022 | 0.29  | NI | 0.36 | NI |
| 83  | A/Krasnoyarsk/87-6V/2022     | A/H1N1pdm09 | 19.11.2022 | 0.21  | NI | 0.37 | NI |
| 84  | A/Novosibirsk/89-15V/2022    | A/H1N1pdm09 | 19.11.2022 | 0.26  | NI | 0.30 | NI |
| 85  | A/Khabarovsk/95-10V/2022     | A/H1N1pdm09 | 28.11.2022 | 0.21  | NI | 0.32 | NI |
| 86  | A/Khabarovsk/95-6V/2022      | A/H1N1pdm09 | 23.11.2022 | 0.19  | NI | 0.28 | NI |
| 87  | A/Khabarovsk/95-7V/2022      | A/H1N1pdm09 | 24.11.2022 | 0.21  | NI | 0.29 | NI |
| 88  | A/Khabarovsk/95-9V/2022      | A/H1N1pdm09 | 23.11.2022 | 0.22  | NI | 0.28 | NI |
| 89  | A/Kamchatka/99-3V/2022       | A/H1N1pdm09 | 29.11.2022 | 0.13  | NI | 0.29 | NI |
| 90  | A/Cheboksary/293-t2V/2023    | A/H1N1pdm09 | 13.02.2023 | 9.92  | RI | 3.37 | RI |
| 91  | A/Khabarovsk/95-5V/2022      | A/H3N2      | 21.11.2022 | 0.18  | NI | 1.00 | NI |
| 92  | B/Vologda/102-5V/2022        | B/Victoria  | 18.11.2022 | 16.05 | NI | 2.83 | NI |
| 93  | B/Yekaterinburg/281-20V/2023 | B/Victoria  | 25.01.2023 | 17.14 | NI | 3.71 | NI |
| 94  | B/Perm/286-b22V/2023         | B/Victoria  | 03.02.2023 | 17.83 | NI | 5.34 | NI |
| 95  | B/Tyumen/288-24V/2023        | B/Victoria  | 02.02.2023 | 16.53 | NI | 4.09 | NI |
| 96  | B/Tyumen/288-25V/2023        | B/Victoria  | 09.02.2023 | 17.31 | NI | 3.70 | NI |
| 97  | B/Perm/302-urt26V/2023       | B/Victoria  | 13.02.2023 | 16.02 | NI | 2.74 | NI |
| 98  | B/Perm/310-b27V/2023         | B/Victoria  | 01.03.2023 | 20.36 | NI | 3.77 | NI |
| 99  | B/Lipetsk/316-1.1V/2023      | B/Victoria  | 09.03.2023 | 19.85 | NI | 4.35 | NI |
| 100 | B/KhMAO/324-63V/2023         | B/Victoria  | 18.03.2023 | 19.60 | NI | 4.43 | NI |
| 101 | B/KhMAO/325-64V/2023         | B/Victoria  | 20.03.2023 | 17.35 | NI | 3.59 | NI |
| 102 | B/KhMAO/325-65V/2023         | B/Victoria  | 20.03.2023 | 15.81 | NI | 3.86 | NI |

|     |                          |            |            |       |    |      |    |
|-----|--------------------------|------------|------------|-------|----|------|----|
| 103 | B/KhMAO/328-71V/2023     | B/Victoria | 29.03.2023 | 20.37 | NI | 4.60 | NI |
| 104 | B/KhMAO/329-76V/2023     | B/Victoria | 24.03.2023 | 15.94 | NI | 3.49 | NI |
| 105 | B/Kalmykia/330-153V/2023 | B/Victoria | 27.03.2023 | 17.10 | NI | 3.16 | NI |
| 106 | B/JAO/331-115V/2023      | B/Victoria | 04.04.2023 | 17.00 | NI | 3.82 | NI |
| 107 | B/KhMAO/339-78V/2023     | B/Victoria | 10.04.2023 | 18.14 | NI | 4.37 | NI |
| 108 | B/Omsk/54-1V/2022        | B/Victoria | 15.11.2022 | 18.52 | NI | 3.53 | NI |

<sup>a</sup> – neuraminidase inhibition by neuraminidase inhibitors according to the WHO antiviral working group criteria: NI – normal inhibition (IC50 fold change compared to the subtype median <10 for Influenza A viruses or <5 for influenza B viruses); RI – reduced inhibition (IC50 fold change compared to the subtype median: 10-100 for Influenza A viruses or 5-50 for influenza B viruses); HRI – highly reduced inhibition (IC50 fold change compared to the subtype median: >100 for Influenza A viruses or >50 for influenza B viruses).
